# Supplementary material for: Hydroxyapatite nanoparticles induced calcium overload-initiated cancer cell-specific apoptosis through inhibition of PMCA and activation of calpain
Source: Royal Society of Chemistry journal article supplement (doi:10.1039/d3tb00542a), 2023-01-01
Supplement: d3tb00542a1.pdf [file d3tb00542a1.pdf]

Supporting information for

**Hydroxyapatite nanoparticles induced calcium overload-initiated  
cancer cell-specific apoptosis through inhibition of PMCA and  
activation of calpain**

Xiulin Dong<sup>a</sup>, Chunyu Zang<sup>a</sup>, Yi Sun<sup>a</sup>, Shuiquan Zhang<sup>b</sup>, Changsheng Liu<sup>b</sup>, Jiangchao Qian<sup>\*a</sup>

<sup>a</sup> *State Key Laboratory of Bioreactor Engineering, East China University of Science and Technology, Shanghai 200237, P.R. China. E-mail: jiangchaoqian@ecust.edu.cn*

<sup>b</sup> *Frontiers Science Center for Materiobiology and Dynamic Chemistry, East China University of Science and Technology Shanghai 200237, P.R. China*

**Raw data of western blot in Fig. 8c:**

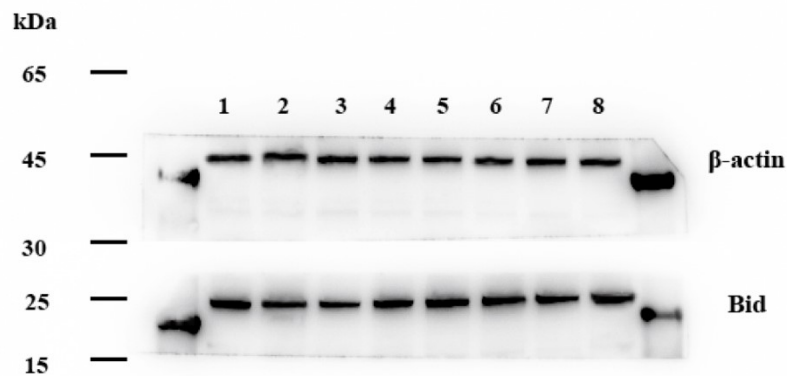

Lane 1: MGC80-3 cells without any treatment;

Lane 2: MGC80-3 cells treated with HAPNs at the concentration of  $250 \mu\text{g mL}^{-1}$ ;

Lane 3: MGC80-3 cells treated with HAPNs at the concentration of  $500 \mu\text{g mL}^{-1}$ ;

Lane 4: MGC80-3 cells treated with HAPNs at the concentration of  $500 \mu\text{g mL}^{-1}$ ,  
together with  $5 \mu\text{M}$  calpeptin;

Lane 5: HepG 2 cells without any treatment;

Lane 6: HepG 2 cells treated with HAPNs at the concentration of  $250 \mu\text{g mL}^{-1}$ ;

Lane 7: HepG 2 cells treated with HAPNs at the concentration of  $500 \mu\text{g mL}^{-1}$ ;

Lane 8: HepG 2 cells treated with HAPNs at the concentration of  $500 \mu\text{g mL}^{-1}$ ,  
together with  $5 \mu\text{M}$  calpeptin.

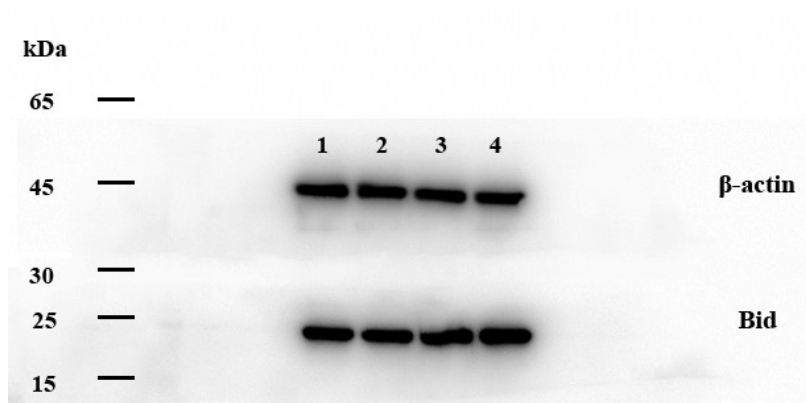

Lane 1: L-02 cells without any treatment;

Lane 2: L-02 cells treated with HAPNs at the concentration of 250  $\mu\text{g mL}^{-1}$ ;

Lane 3: L-02 cells treated with HAPNs at the concentration of 500  $\mu\text{g mL}^{-1}$ ;

Lane 4: L-02 cells treated with HAPNs at the concentration of 500  $\mu\text{g mL}^{-1}$ , together with 5  $\mu\text{M}$  calpeptin.
